# Supplementary material for: Rapidly synthesized ZnOnanowires by ultraviolet decomposition process in ambient air for flexible photodetector
Source: Royal Society of Chemistry journal article supplement (doi:10.1039/c0nr00595a), 2010-12-15
Supplement: c0nr00595a.pdf [file c0nr00595a.pdf]

## Supplementary Information

### **Rapidly Synthesized ZnO Nanowires by Ultraviolet Decomposition**

#### **Process in Ambient Air for Flexible Photodetector**

Jyh Ming Wu<sup>a</sup>, Yi-Ru Chen<sup>a</sup>, and Yu-Hung Lin<sup>b</sup>

<sup>a</sup> Department of Materials Science and Engineering, Feng Chia University, 100 Wenhwa Rd., Seatwen, Taichung 40724, Taiwan.

<sup>b</sup> Department of Materials Science and Engineering, National Tsing Hua University, Hsinchu 300, Taiwan

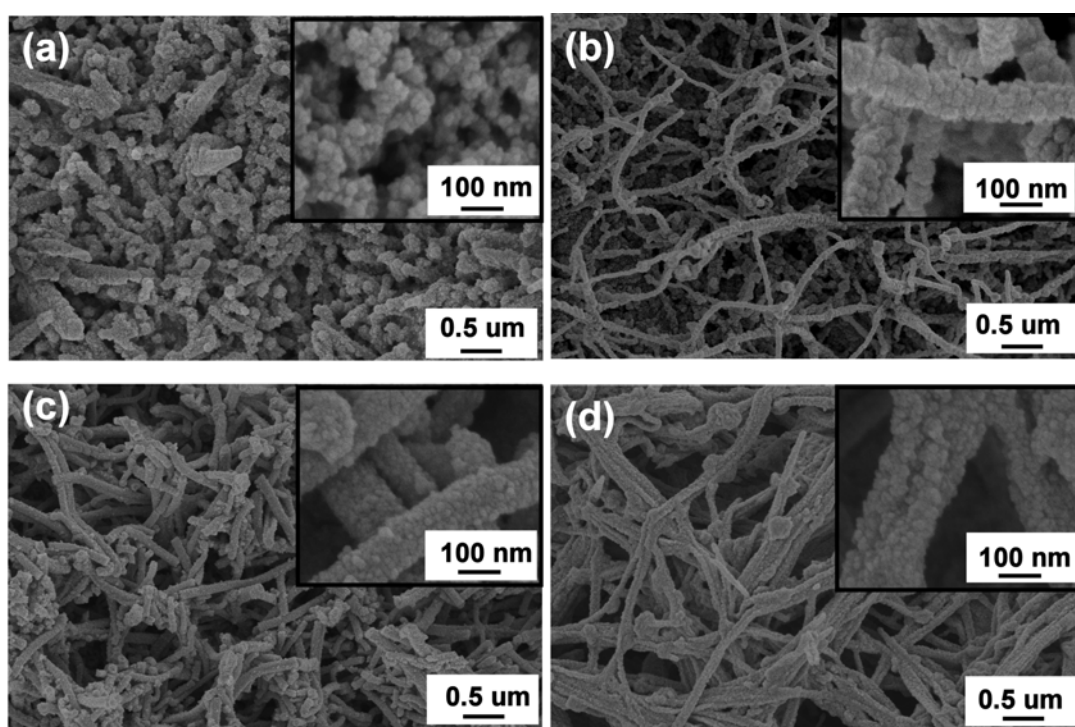

Figure S1 As-synthesized ZnO nanowires by UV-light decomposition process for (a) 3 minutes, (b) 5 minutes, (c) 10 minutes, (d) 40 minutes.

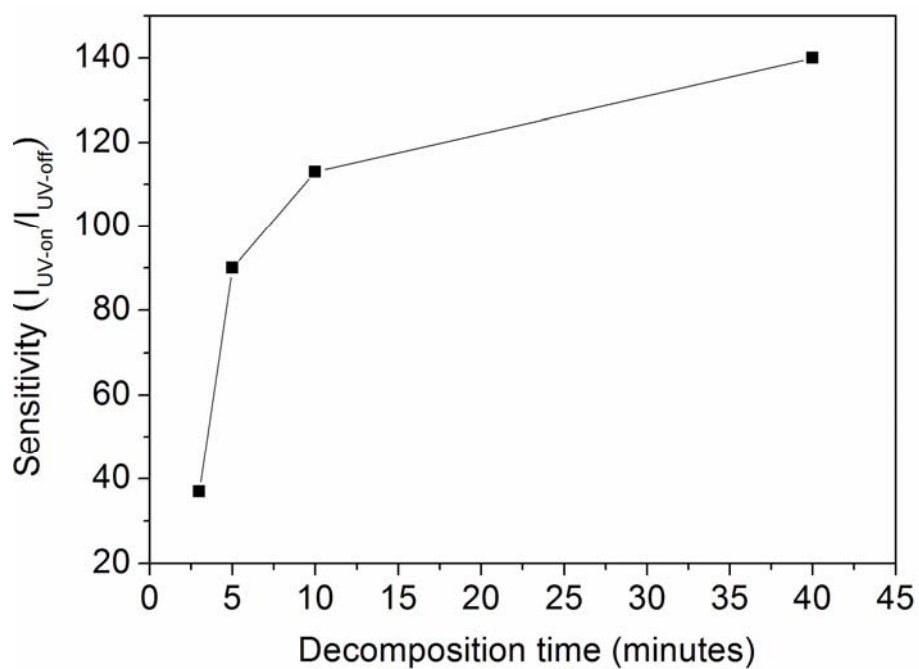

Figure S2 Sensitivities for UV decomposition times of 3, 5, 10, and 40 minutes are 37, 90, 113, and 140 fold, respectively.
